# Supplementary material for: pH-Sensitive graphene oxide conjugate purpurin-18 methyl ester photosensitizer nanocomplex in photodynamic therapy
Source: Royal Society of Chemistry journal article supplement (doi:10.1039/c8nj00439k), 2018-01-01
Supplement: c8nj00439k1.pdf [file c8nj00439k1.pdf]

## Supporting Information for *New Journal of Chemistry*

### pH-Sensitive graphene oxide conjugate Purpurin-18 methyl ester photosensitizer nanocomplex in photodynamic therapy

Ying Zhang, Hongyue Zhang, Zhiqiang Wang\* and Yingxue Jin\*

*Key Laboratory of Photochemistry biomaterials and Energy storage materials of Heilongjiang Province, College of Chemistry & Chemical Engineering, Harbin Normal University, Harbin, 150025, China. E-mail: jyxprof@163.com, wzq70402@163.com; Tel: +86-0451-88060569.*

#### Results and discussion

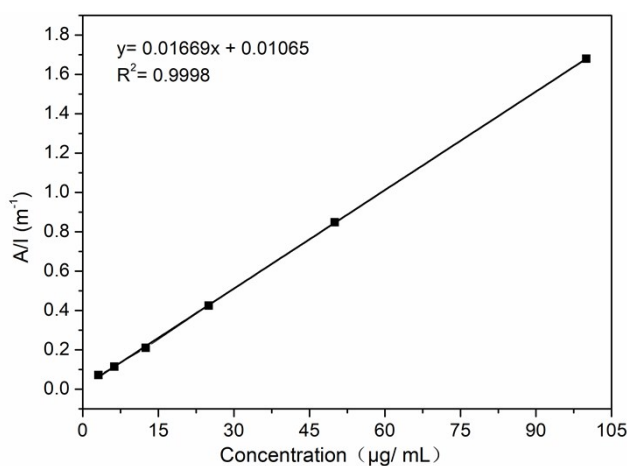

**Figure S1.** Absorbance of free Pu18 at Qy band per cell length as a function of various concentrations, and corresponding molar extinction coefficient was normalized by linear regression.

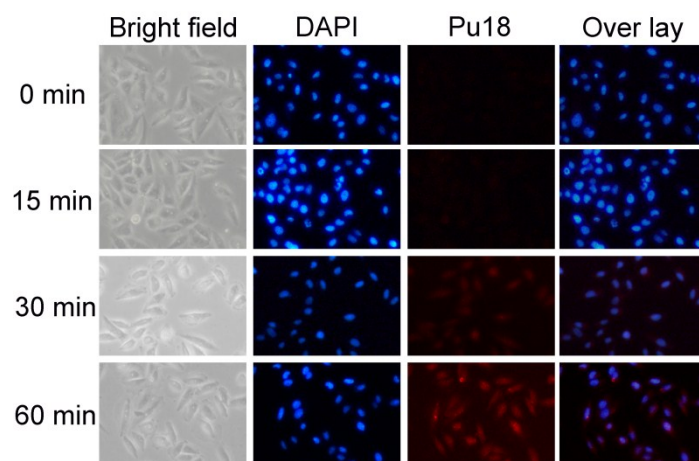

**Figure S2.** In vitro uptake of free Pu18 was observed by fluorescence inverted microscopic after incubating HepG-2 cells with free Pu18 at 0, 15, 30 and 60 min, respectively. The blue fluorescence was attributed to cell nucleus (stained by DAPI), the red fluorescence was due to Pu18 and the overlay image in DAPI and Pu18 channels on the same cell.
